# Supplementary material for: Chiral and achiral linear coordination polymers from aldaric acids
Source: Royal Society of Chemistry journal article supplement (doi:10.1039/c001505a), 2010-01-01
Supplement: c001505a.pdf [file c001505a.pdf]

## **Linear Coordination Polymers from Aldaric Acids†**

Brendan F. Abrahams\*, Martin J. Grannas, Laura J. McCormick, Richard Robson\* and Peter J. Thistlethwaite

School of Chemistry, University of Melbourne, Victoria 3010, Australia

### **Electronic Supplementary Information**

**S1 Measured and calculated powder diffraction patterns**  
**S2 Thermogravimetric traces**

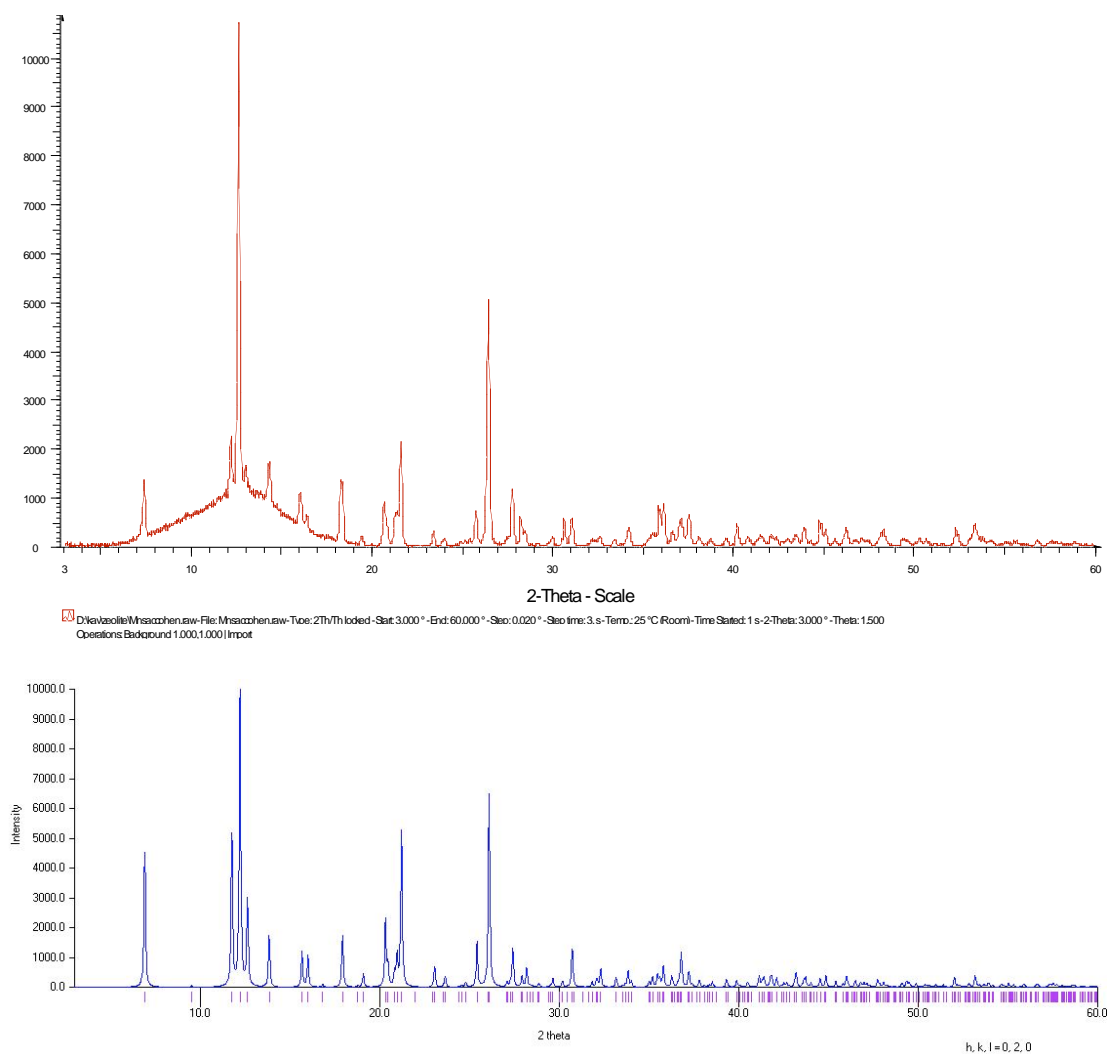

**Figure S1.1** Measured and calculated powder diffraction patterns for  $\text{Mn(phen)(sacc)} \cdot 2.25\text{H}_2\text{O}$

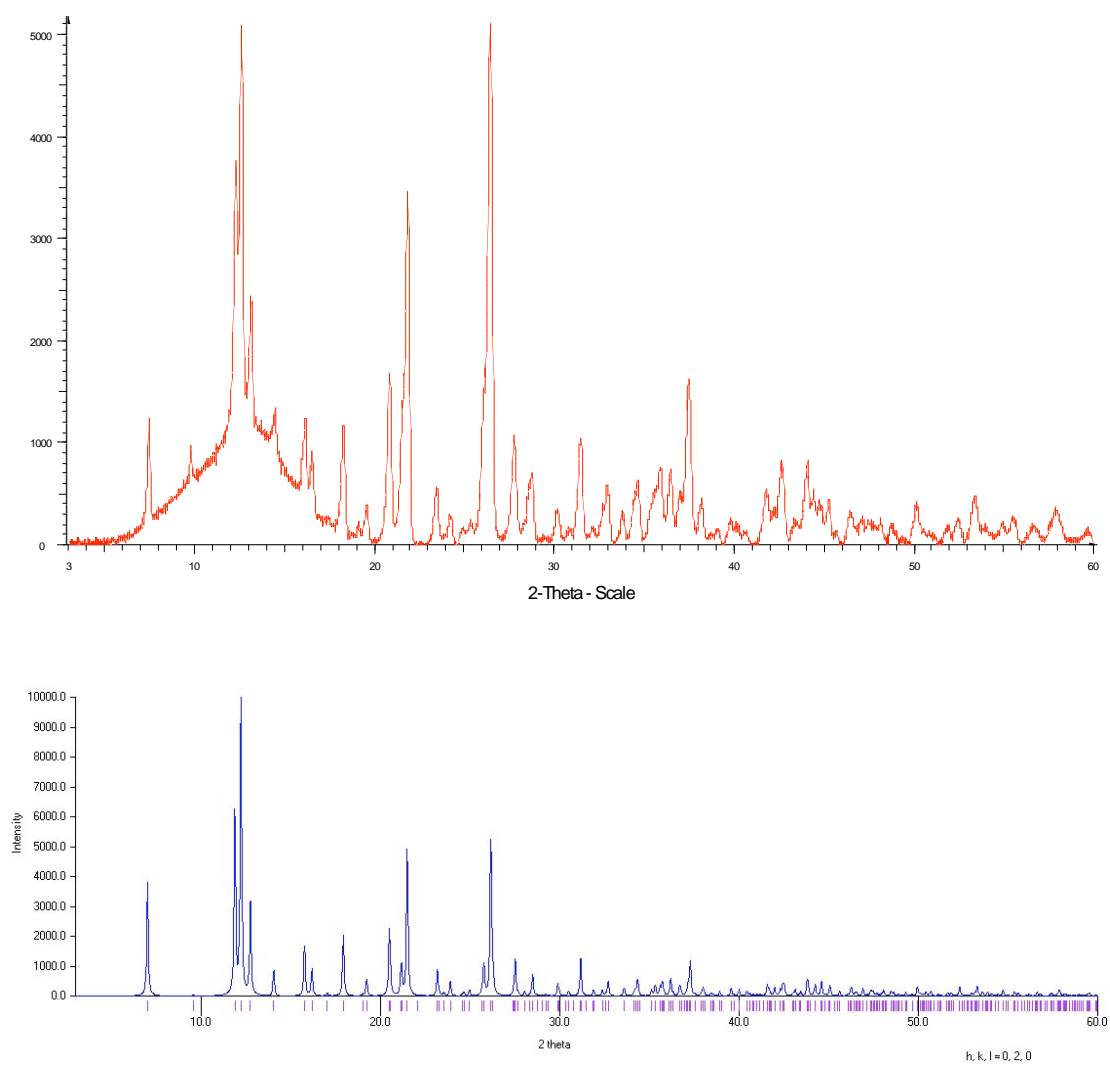

**Figure S1.2** Measured and calculated powder diffraction patterns for Zn(phen)(sacc)·2H<sub>2</sub>O

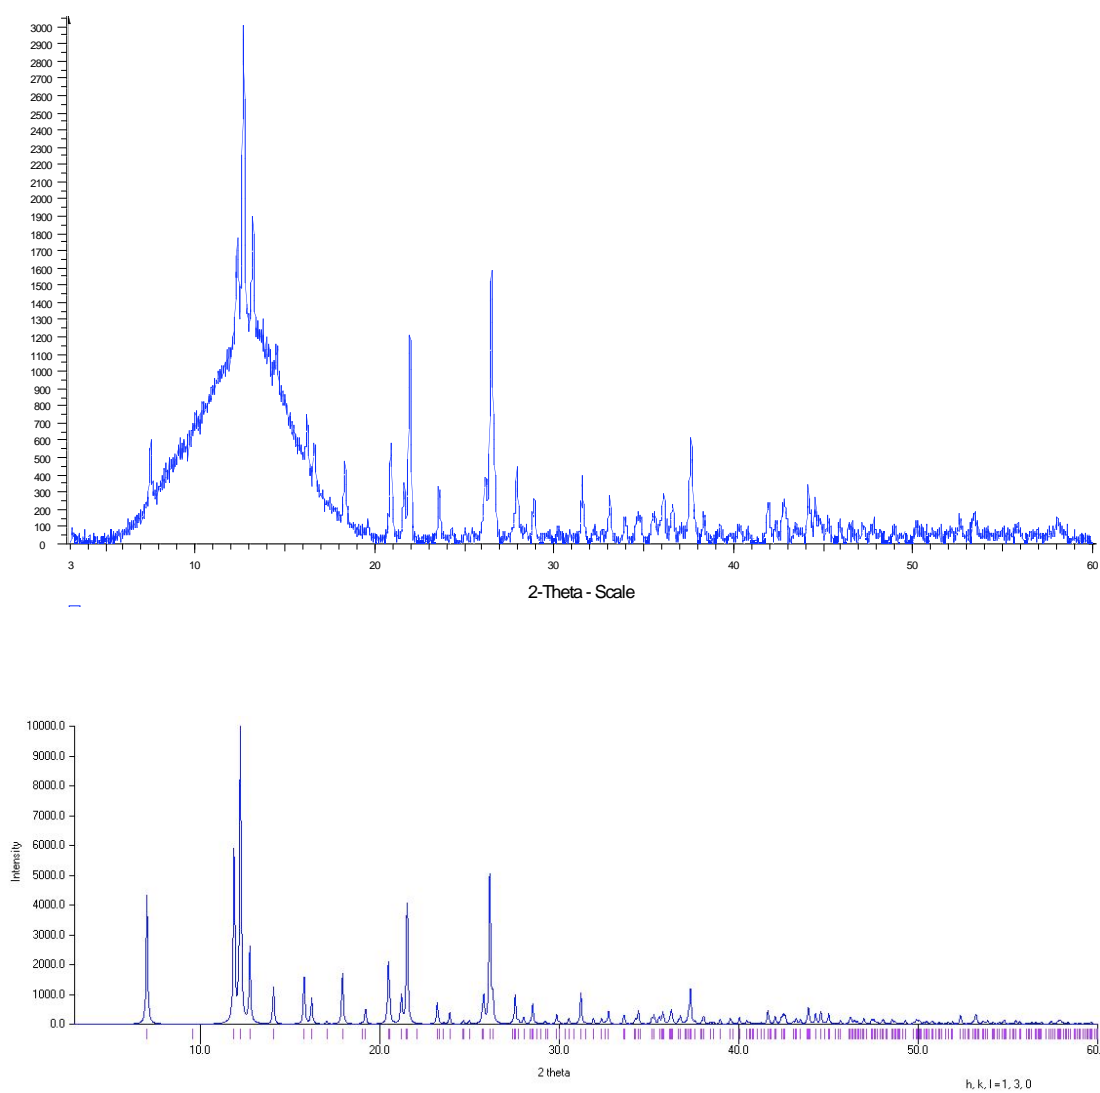

**Figure S1.3** Measured and calculated powder diffraction patterns for  $\text{Co(phen)(sacc)} \cdot 2\text{H}_2\text{O}$

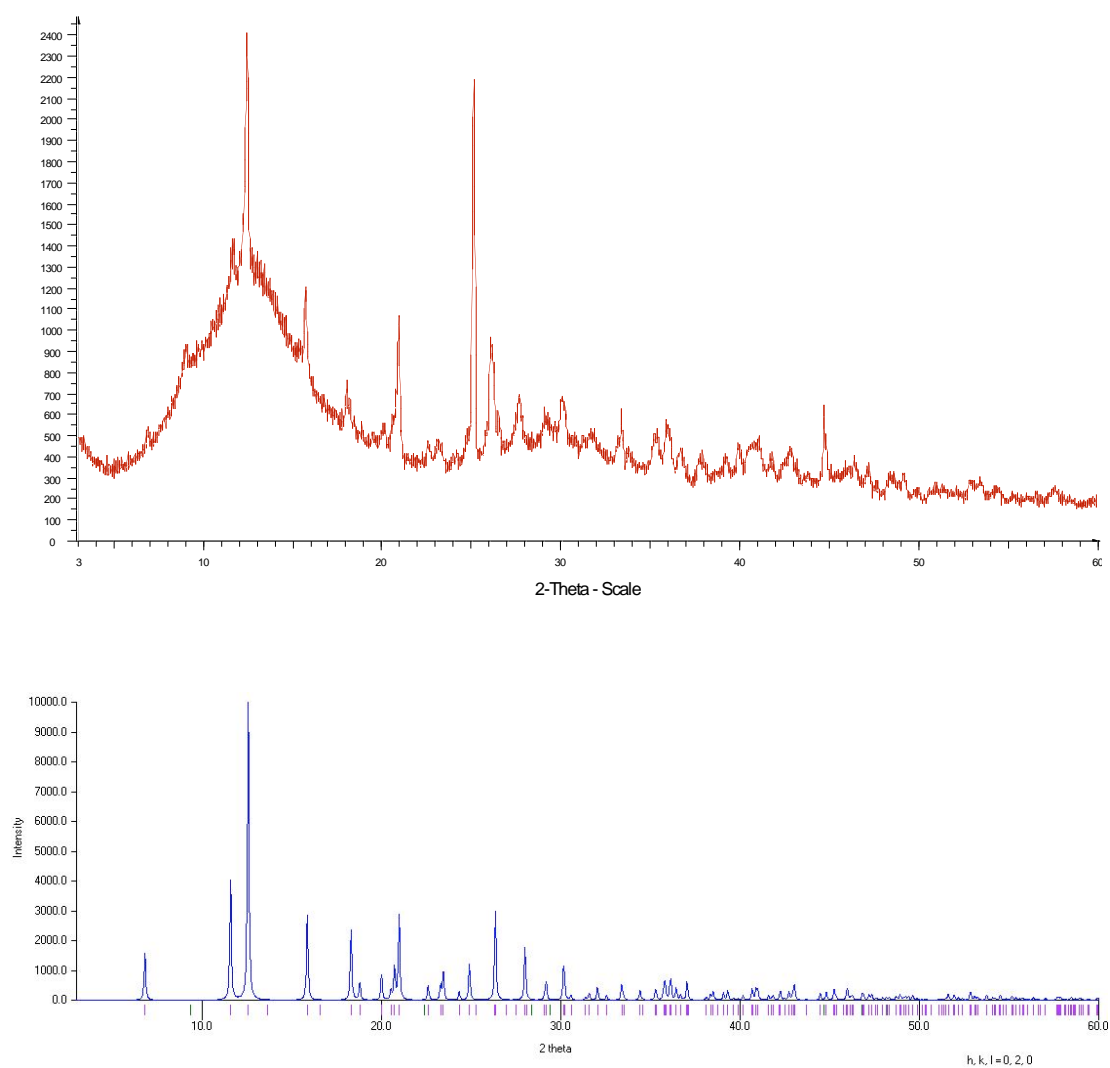

**Figure S1.4** Measured and calculated powder diffraction patterns for Cd(phen)(muc)·H<sub>2</sub>O

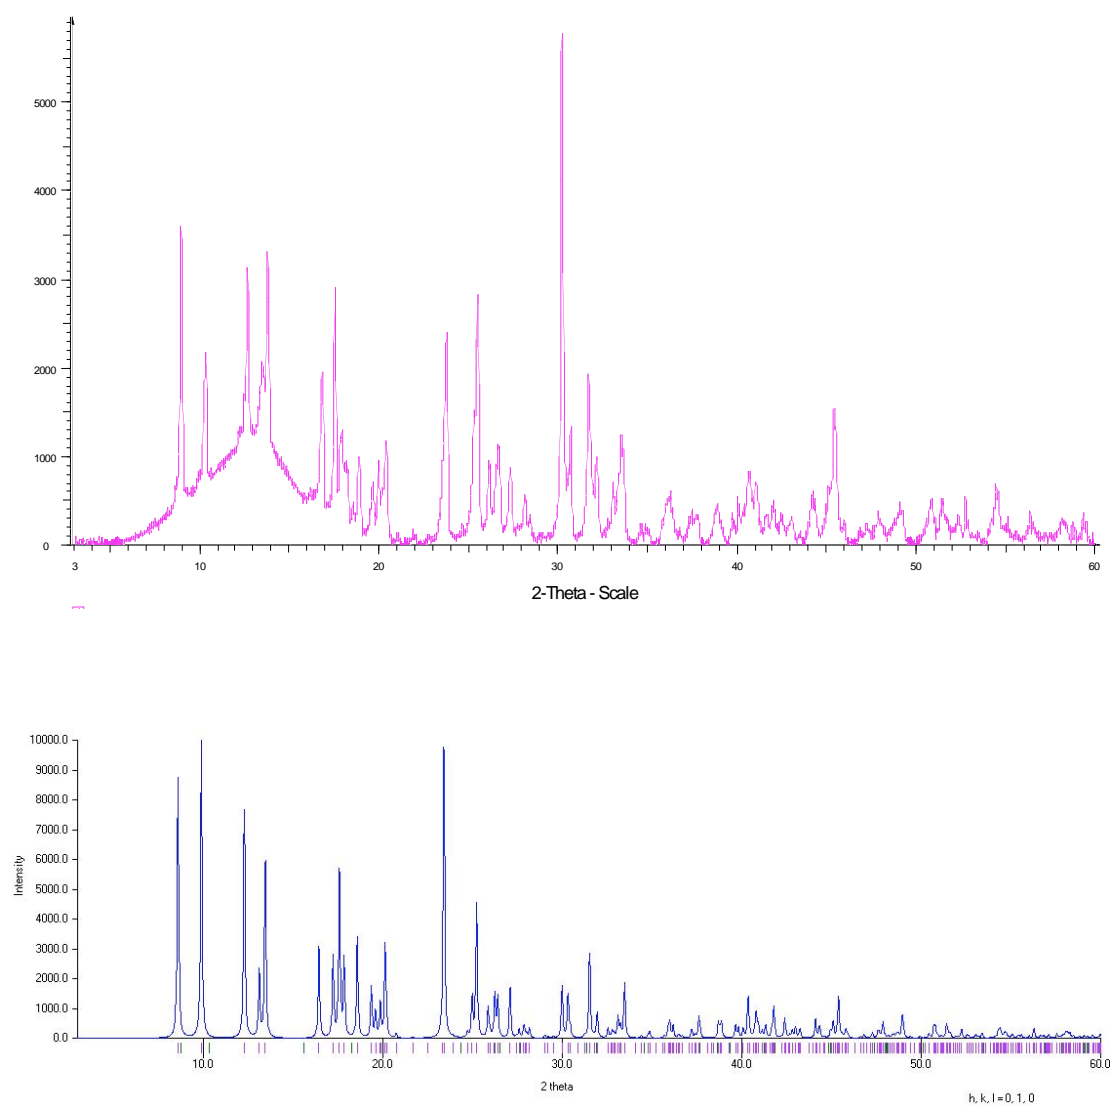

**Figure S1.5** Measured and calculated powder diffraction patterns for  $\text{Cu(phen)(muc)} \cdot 3\text{H}_2\text{O}$

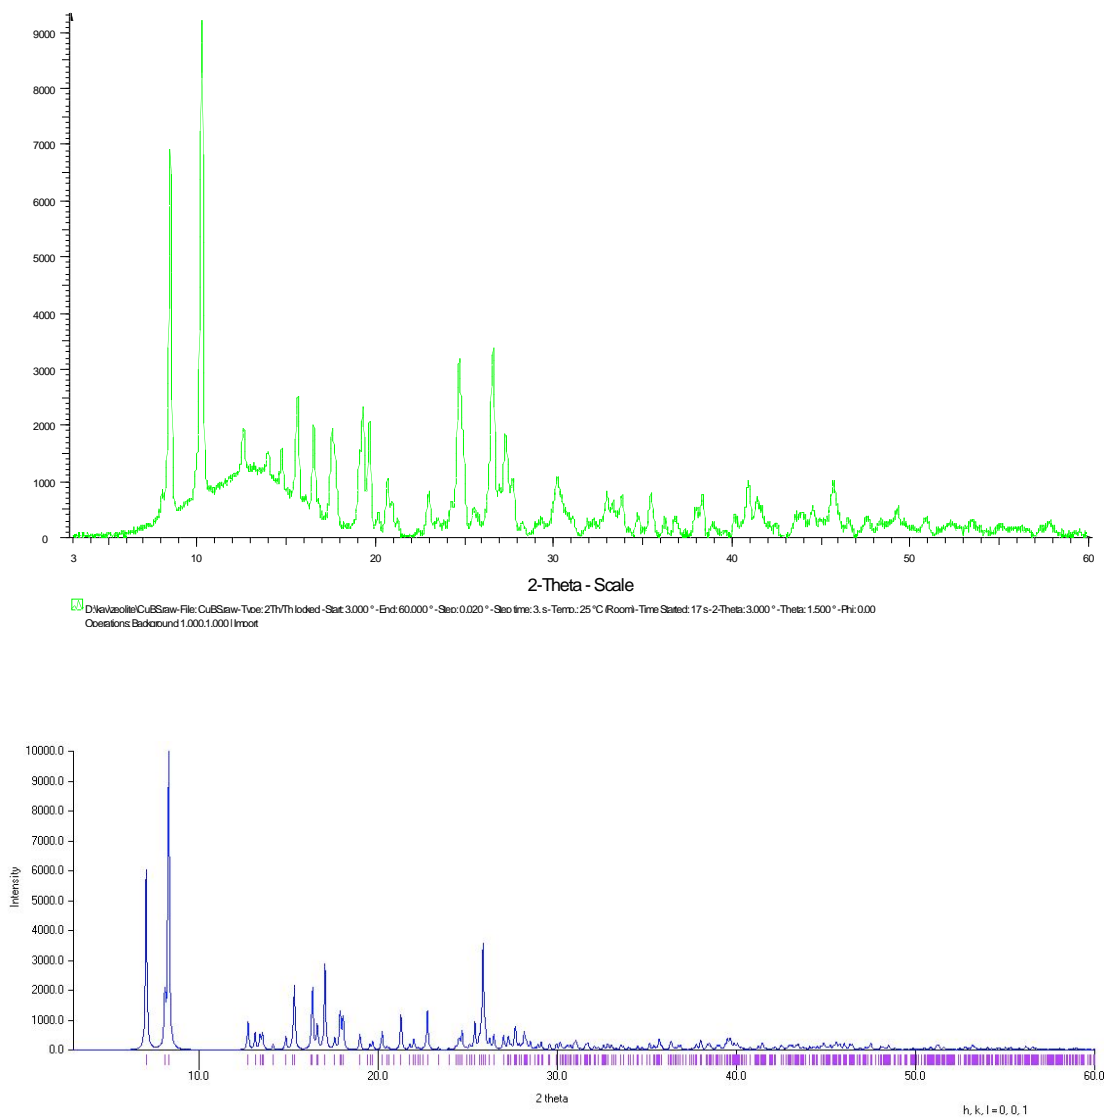

**Figure S1.6** Measured and calculated powder diffraction patterns for  $\text{Cu}_2(\text{bipy})_2(\text{sacc})_2 \cdot 9\text{H}_2\text{O}$

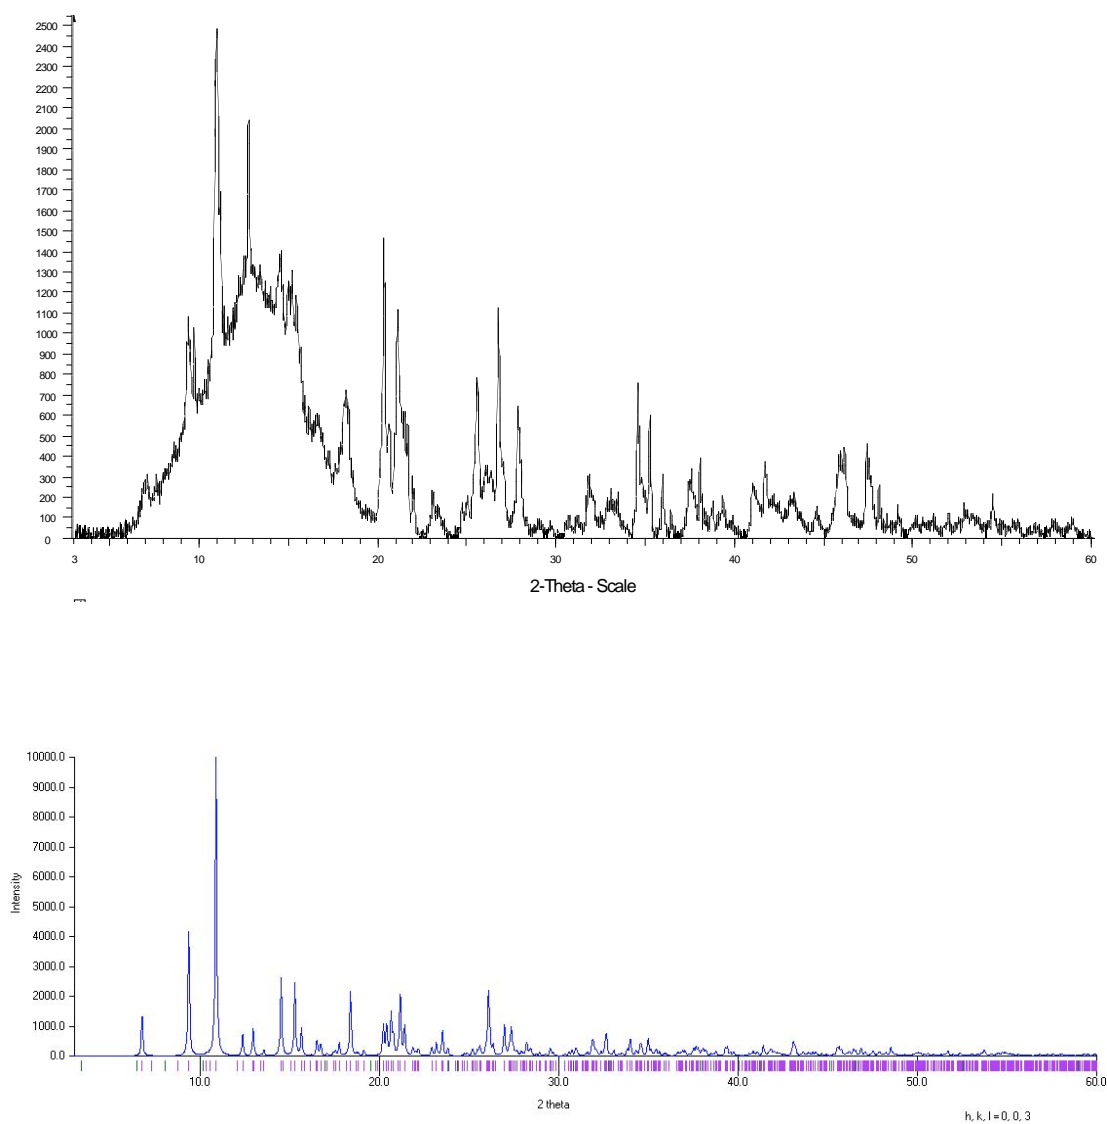

**Figure S1.7** Measured and calculated powder diffraction patterns for  $\text{Zn}_2(\text{bipy})_2(\text{sacc})_2 \cdot 7\text{H}_2\text{O}$



**Figure S1.7** Measured and calculated powder diffraction patterns for  $\text{Zn}_2(\text{bipy})_2(\text{sacc})_2 \cdot 7\text{H}_2\text{O}$

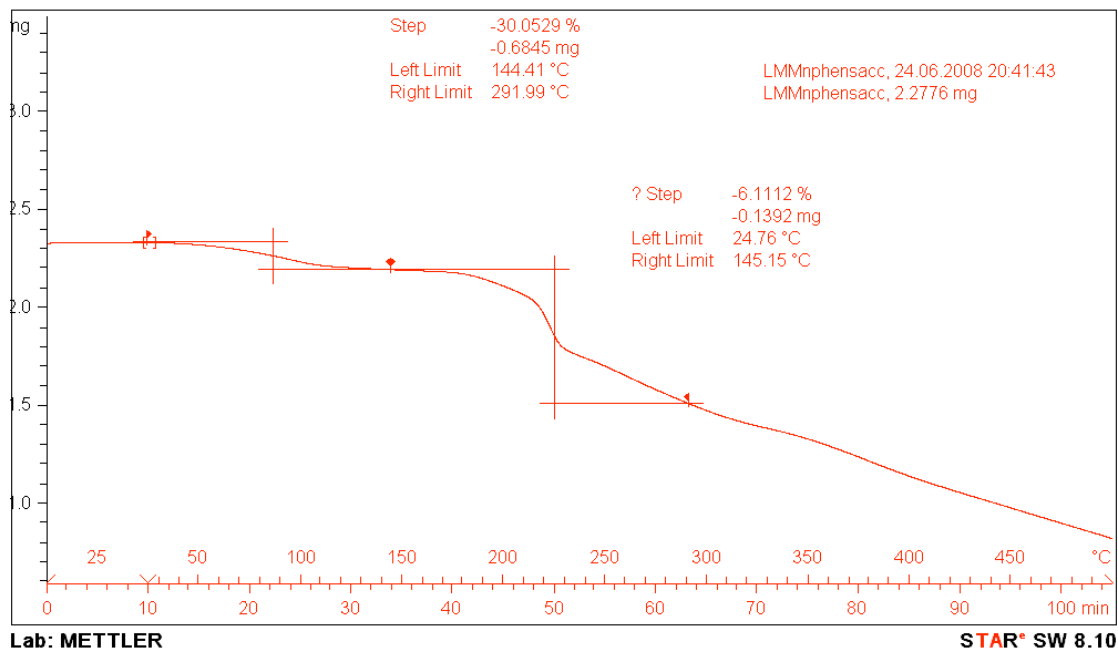

**Figure S2.1** Thermogravimetric trace for  $\text{Mn}(\text{phen})(\text{sacc}) \cdot 2.25\text{H}_2\text{O}$

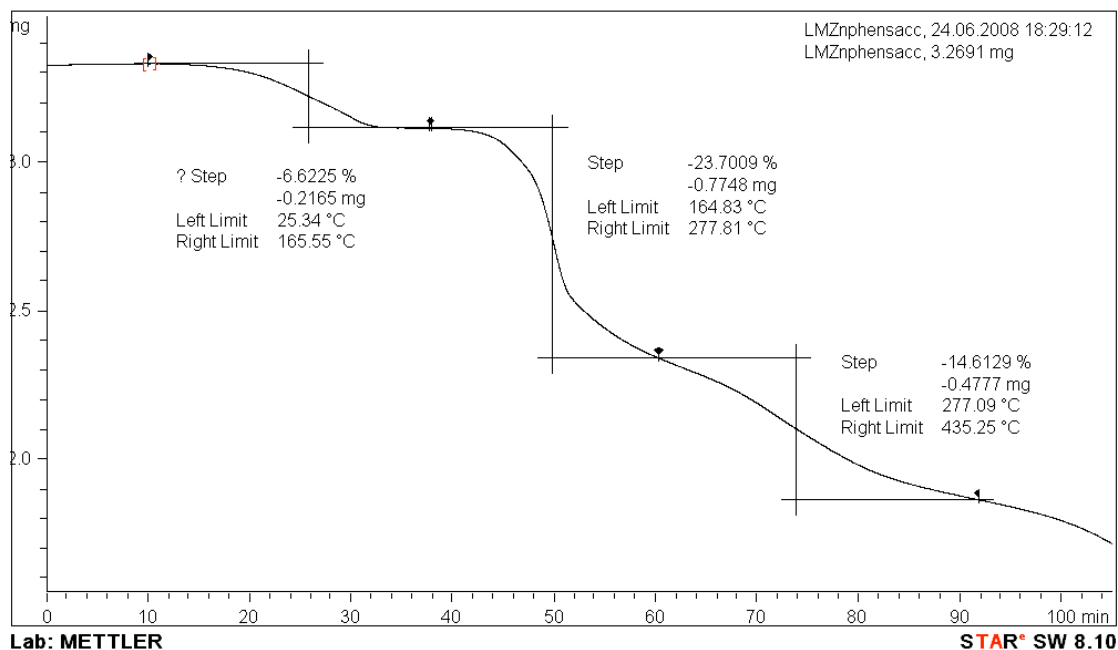

**Figure S2.2** Thermogravimetric trace for  $\text{Zn}(\text{phen})(\text{sacc}) \cdot 2\text{H}_2\text{O}$

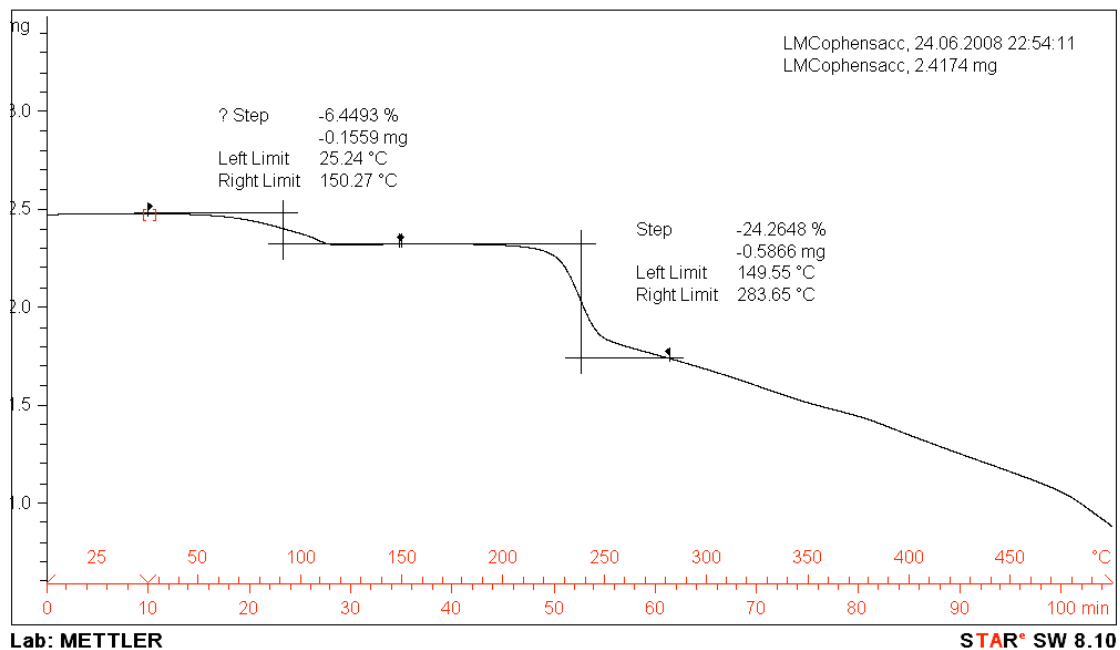

Figure S2.3 Thermogravimetric trace for  $\text{Co(phen)(sacc)} \cdot 2\text{H}_2\text{O}$

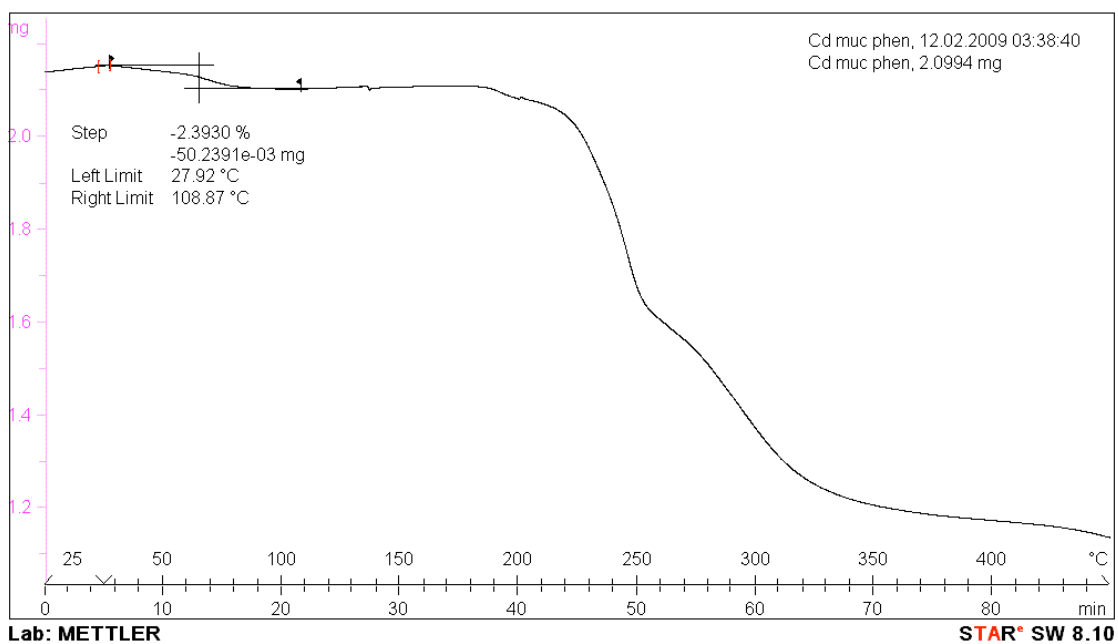

Figure S2.4 Thermogravimetric trace for  $\text{Cd(phen)(muc)} \cdot \text{H}_2\text{O}$

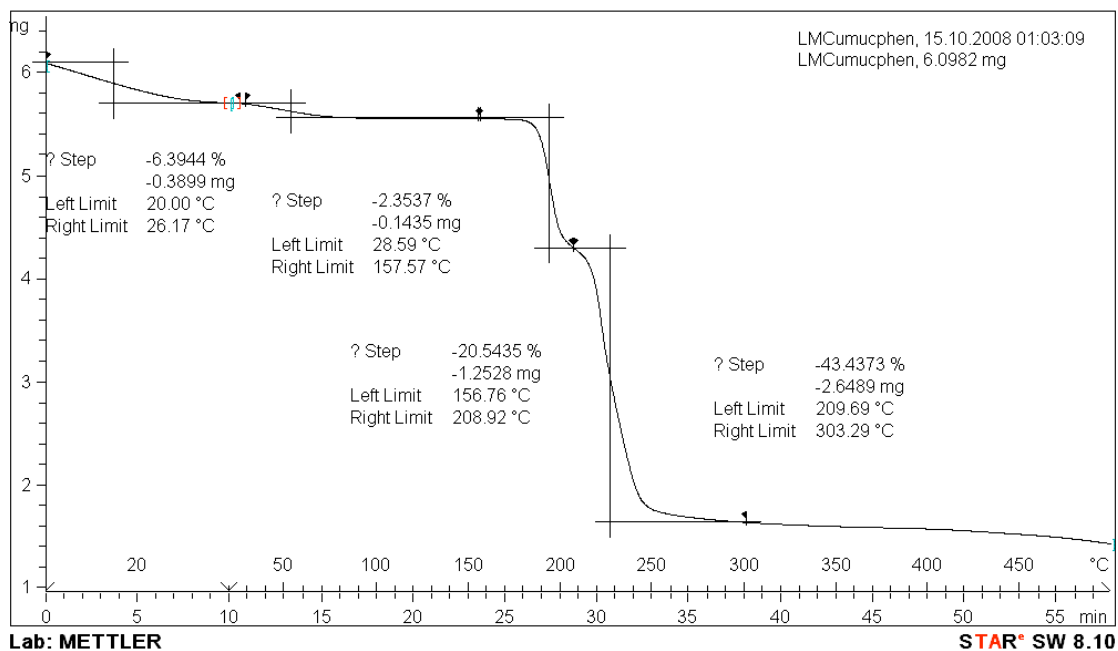

Figure S2.5 Thermogravimetric trace for  $\text{Cu}(\text{phen})(\text{muc})\cdot 3\text{H}_2\text{O}$

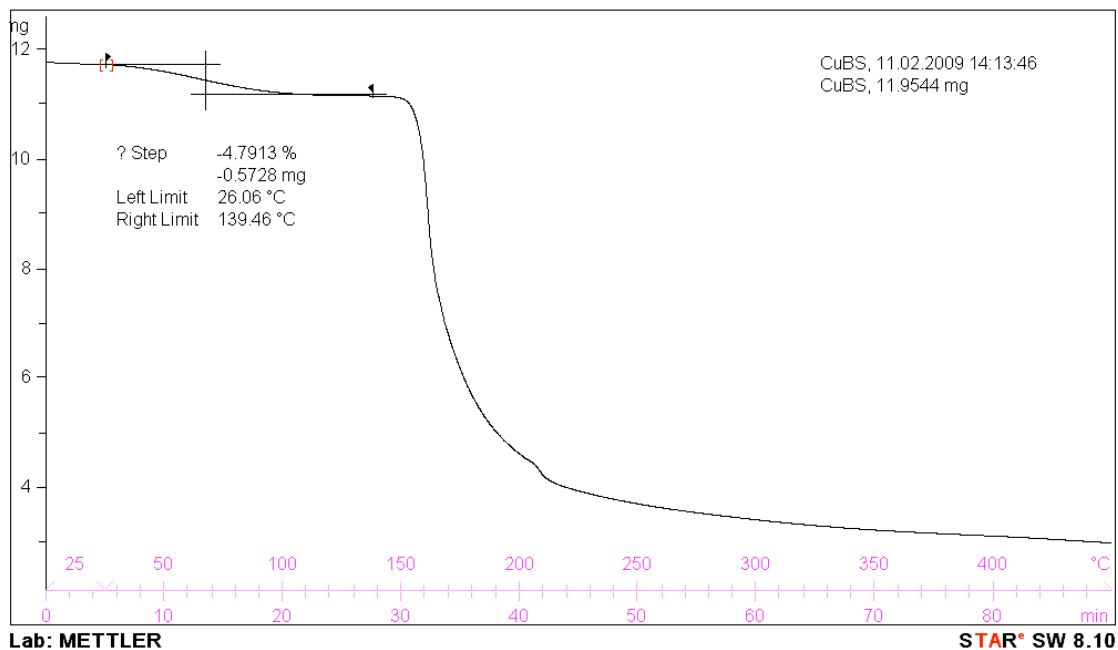

Figure S2.6 Thermogravimetric trace for  $\text{Cu}_2(\text{bipy})_2(\text{sacc})_2\cdot 9\text{H}_2\text{O}$

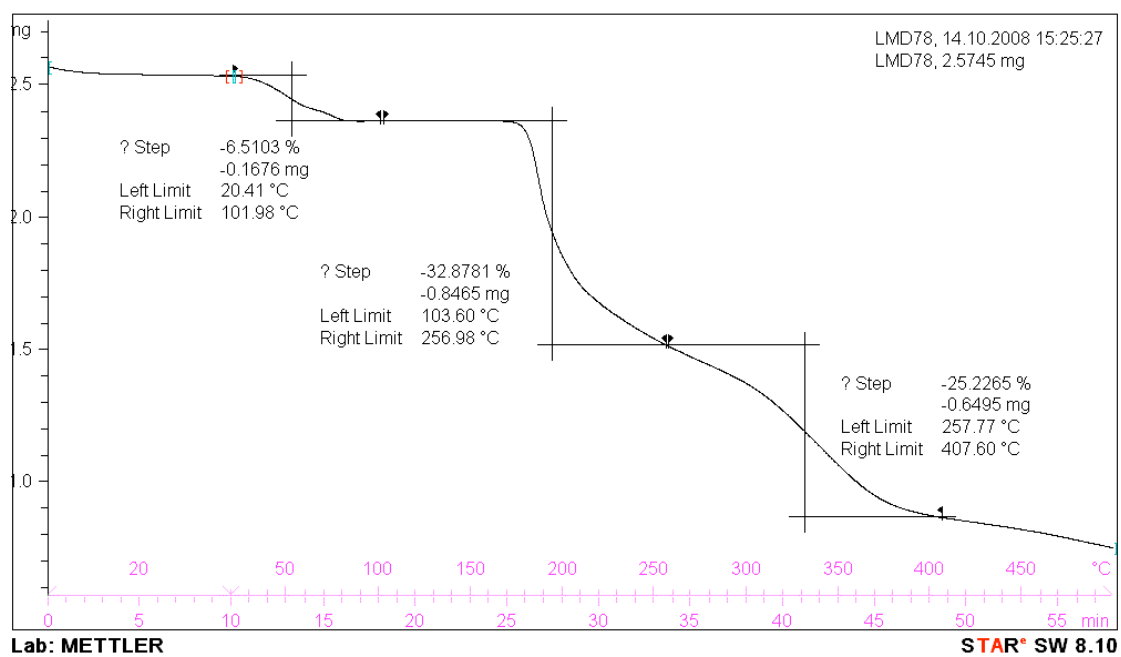

**Figure S2.7** Thermogravimetric trace for  $\text{Zn}_2(\text{bipy})_2(\text{sacc})_2 \cdot 7\text{H}_2\text{O}$
